# Supplementary material for: A zebrafish model of lethal congenital contracture syndrome 1 reveals Gle1 function in spinal neural precursor survival and motor axon arborization
Source: Oxford University Press journal article supplement (doi:10.1242/dev.074344), 2012-02-23
Supplement: dev074344tables1.pdf [file dev074344tables1.pdf]

| <b>Table S1. Primers</b>                                                |               |                                                                     |
|-------------------------------------------------------------------------|---------------|---------------------------------------------------------------------|
| <b>Application</b>                                                      | <b>Oligo</b>  | <b>Sequence (5' to 3')</b>                                          |
| Genotyping primers for <i>gle1<sup>hi4161a</sup></i> proviral insertion | Universal LTR | AAGACCCACCTGTAGGTTTGG                                               |
|                                                                         | geno_gle1-F   | CCACCGACGAAATGAAACAAAT                                              |
|                                                                         | geno_gle1-R   | CACCCAGTCTGGGCTGTATTTG                                              |
| Cloning of zebrafish <i>gle1</i> isoforms (RT-PCR)                      | gle1-F        | GGGGACAAGTTTGTACAAAAAAGCAGGCTCCACCATGCCTTCTGAAA<br>ACCTTCGGTGG      |
|                                                                         | gle1a-R       | GGGGACCACTTTGTACAAGAAAGCTGGGTATATTGGCGCCGACGTTT<br>ATTCTATATTG      |
|                                                                         | gle1b-R       | GGGGACCACTTTGTACAAGAAAGCTGGGTAGATGATCTCCACCAATC<br>AGGACCTGA        |
| Cloning of <i>mx1</i> upstream elements                                 | mx1-F         | GGGGACAACCTTTGTATAGAAAAGTTGTAGGTTTCACACTCATCACTTG<br>GCATCTG        |
|                                                                         | mx1-R         | GGGGACTGCTTTTTTTGTACAAACTTGACTGGCCACCTCACAAACAGA<br>TTAAC           |
| Cloning of human <i>GLE1b</i> (for in vitro transcription)              | hsgle1b-F     | GGGGACAAGTTTGTACAAAAAAGCAGGCTCCACCATGCCGTCTGAGG<br>GTCGCTGC         |
|                                                                         | hsgle1b-R     | GGGGACCACTTTGTACAAGAAAGCTGGGTATGGAGTGACATCAGGAG<br>CGCCAGAAGGAGGAAG |
